# Supplementary material for: Assessment of Genetic Diversity and Population Structure of the Endangered Astragalus exscapus subsp. transsilvanicus through DNA-Based Molecular Markers
Source: MDPI journal article supplement (doi:10.3390/plants10122732), 2021-12-11
Supplement: s1 [file s1]

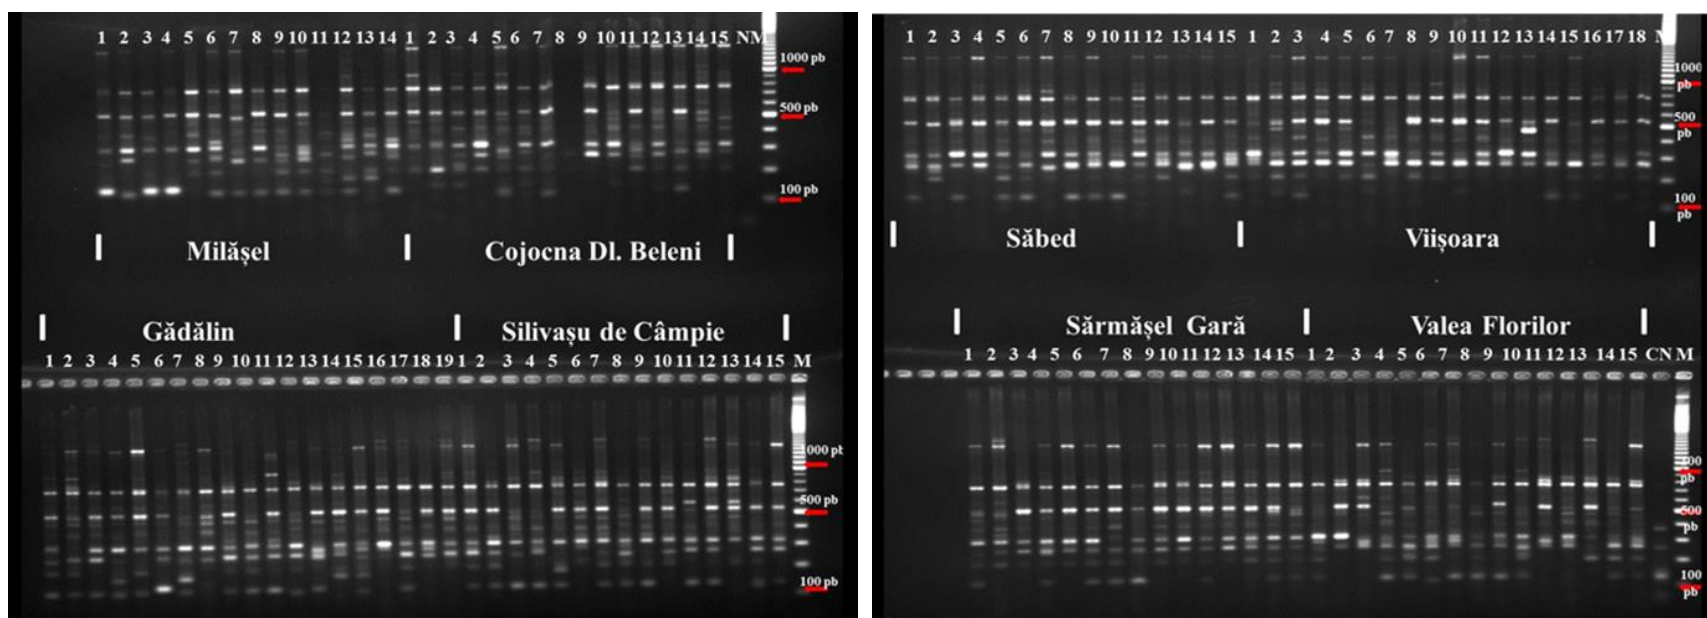

**Supplementary Figure S1** Electrophoretic profiles of individuals from the eight studied populations, generated by the SRAP primer combination Me4/Em5
