# Supplementary material for: Assessment of Genetic Diversity and Population Structure of the Endangered Astragalus exscapus subsp. transsilvanicus through DNA-Based Molecular Markers
Source: MDPI journal article supplement (doi:10.3390/plants10122732), 2021-12-11
Supplement: s1 [file s1]

| K | Reps | Mean LnP(K)  | Stdev LnP(K) | Ln'(K)     | Ln''(K)    | Delta K   |
|---|------|--------------|--------------|------------|------------|-----------|
| 1 | 10   | -8779.420000 | 13.434268    | —          | —          | —         |
| 2 | 10   | -8405.200000 | 16.375456    | 374.220000 | 233.230000 | 14.242657 |
| 3 | 10   | -8264.210000 | 23.783395    | 140.990000 | 28.920000  | 1.215974  |
| 4 | 10   | -8152.140000 | 41.402823    | 112.070000 | 52.880000  | 1.277208  |
| 5 | 10   | -8092.950000 | 57.517133    | 59.190000  | —          | —         |

(a)

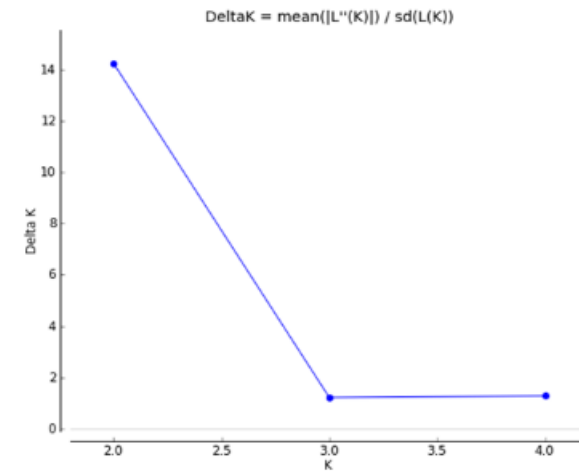

(b)

**Supplementary Figure S2.** Graphical representation of population structure using STRUCTURE 2.3.4. software and Harvester v. 6.0 online program. (a) Evanno table output; (b) the median and variance of the estimated probability value for each K value.
